# Supplementary material for: Mesothelioma Associated Fibroblasts Modulate the Response of Mesothelioma Patient Derived Organoids to Chemotherapy through Interleukin-6.
Source: Preprints.org preprint supplement (doi:10.20944/preprints202403.1058.v1), 2024-03-18
Supplement: Supplementary file 1 [file supplementary]

**Suppl. Figure 1**. Graph representing the effect of MAF- CM on the average max diameter of the mPDO#2,3,4 at each passage (0-4). Please note that passage 0 refers to 5 days after seeding.

**Suppl. Figure 2. The CM from chemotherapy treated MAFs increased the expression of stem cell markers**. Representative heat maps of the expression levels of the indicated mRNAs, as assessed by qRT-PCR, at the indicated time, after addition of the MAF-CM. Values expressed as fold over ctrl (n-CM treated mPDO#2,3,4). The average of two independent experiments is reported. Statistics: *p<0-05; ** p< 0.01; *ns*= not significant.

**Suppl. Figure 3.** Kaplan-Meier plot of 84 MPM assessed for the levels of FGF9 mRNA. Kaplan Meier analysis was performed with the Xena platform (42).
